# Supplementary material
Source: PubMed Central journal article supplement (PMC5723995)

**Supplementary Figure 1**

YTA10 1 MMMQRYARGAPRSLTSLSFQKASRISTVKPVLRSRMPVHQRLQTLISGLA 50  
 :..||: |||:| |. | |.|| |.:..||  
 YTA12 1 -----MLLLSW---SRIAT-KVV---RRPV--RFRSYYGL- 26  
 YTA10 51 TRNTIHRSTQIRSFHISWTRLNENRPNKEGEGKNGKNDNNSNK----- 94  
 |.:|. |..:..||.:. ||. |...: |.:...||  
 YTA12 27 -----THIKSLHTQYRLNRLQENKSGNKNEEDNEDAKLNKEIPTDE 68  
 YTA10 95 ----- 94  
 YTA12 69 EVEAIRKQVEKYIEQTKNNTIPANWKEQKRKIDESIRRELEDAVLKQESNR 118  
 YTA10 95 --EDGDKRNEFG--SLSEYFRSKE----- 115  
 |.:|. |..:..||.:. ||. |...: |.:...||  
 YTA12 119 IQEERKEKEEENGPSKAKSNRTKEQGYFEGNNSRNIPPPPPPPPKPPLN 168  
**TM1**  
 YTA10 116 ----FANTMFLTI GFTI IFTLLTPSSNNSGDDSNRVLTFQDFKTKYLE 159  
 ..|...:..||.:. ||. |...: |.:...||  
 YTA12 169 DPSNPVSKNVNLFQIGLTFLLSFLDLLNSLEEQSEI-TWQDFREKLLA 217  
 YTA10 160 KGLVSKIYVVKFLVEAELVNT-----KQVVSFTIGSVDIFEEQMD 200  
 ||.:|. |...:..||.:. ||. |...: |.:...||  
 YTA12 218 KGYVAKLIVVNSMVKVMLNDNGKNQADNYGRNFYFTIGSIDSEHKLQ 267  
**TM2**  
 YTA10 201 QIQDLLNIPPRDRIPIKYIERSSPFTFLFPFLPTIILLGGLYFITRKINS 250  
 :. ||.: |...:..||.:. ||. |...: |.:...||  
 YTA12 268 KAQDELIDKDFRIPVLVYQEGNWAAMFQILPTVLMIAGI IWLTRR--- 314  
 YTA10 251 SPPNANGGGGGGLGGMFNVGKSRALFNKETDIKISFKNVAGCDEAKQEI 300  
 :... ||.: |...:..||.:. ||. |...: |.:...||  
 YTA12 315 ----SAQAAGSGRGGIFGLSRSKAKKFNTETDVKIKFKDVAGCDEAKKEI 360  
 YTA10 301 MEFVHFLKNPGKYTKLGAKIPRGAILSGPPGTGKTLAKATAGEANVPFL 350  
 ||||. ||.: |...:..||.:. ||. |...: |.:...||  
 YTA12 361 MEFVSLKEPSRYEKMGAIPRGAILSGPPGTGKTLAKATAGEAGVPFY 410  
 YTA10 351 SVSGSEFVEMFVGASRVRLFTQARSMAPSIIFIDEIDAIGKERGKGG 400  
 . ||||. ||.: |...:..||.:. ||. |...: |.:...||  
 YTA12 411 FVSGSEFVEMFVGGAARVRLFKTARENAPSIIVFIDEIDAIGKARQKGN 460

YTA10 401 ALGGANDEREATLNQLLVEMDGFTTSDQVVVLAGTNRPDVLDNALMRPGR 450  
 .. ||||. ||.: |...:..||.:. ||. |...: |.:...||  
 YTA12 461 -FSGANDERENTLNQMLVEMDGFTPADHVVLAGTNRPDILDKALLRPGR 509  
 YTA10 451 FDRHIQIDSPDVNGRQQIYLVHLKRLNLDPLLTDMMNLSGKLATLTPGF 500  
 ||||. ||.: |...:..||.:. ||. |...: |.:...||  
 YTA12 510 FDRHINIDKPELEGRKAI FAVHLHHLK----LAGEIFDLKNRLAALTPGF 555  
 YTA10 501 TGADIANACNEAALIAARHNDPYITIHFEQAIERVIAGLEKTRVLSKE 550  
 : ||||. ||||. ||.: |...:..||.:. ||. |...: |.:...||  
 YTA12 556 SGADIANVCNEAALIAARSDAVALKNHFEQAIERVI GGVERKSKLLSPE 605  
 YTA10 551 EKRSVAYHEAGHAVCGWFLKYADPLLKVSIPRGGALGYAQYLPDQYL 600  
 ||.: ||||. ||||. ||.: |...:..||.:. ||. |...: |.:...||  
 YTA12 606 EKKVVAYHEAGHAVCGWYLYADPLLKVSIPRGGALGYAQYLPDIFL 655  
 YTA10 601 ISEEQFRHRMIMALGGRVSEELHFPSVTSGAHDDFKKVTQMANAMVTSLG 650  
 :.: |.: |...:..||.:. ||. |...: |.:...||  
 YTA12 656 LTEQQLKDRMTMSLGGRVSEELHFPSVTSGASDDFKKVTSMATAMVTELG 705  
 YTA10 651 MSPKIGYLSFDQNDGNFKNVPFSNKTARTIDLEVKSIVDDAHRACTELL 700  
 ||. ||.: |...:..||.:. ||. |...: |.:...||  
 YTA12 706 MSDKIGWVNYQKRDDS-DLTKPFSDETGIDSEVYRIVQECHDRCTKLL 754  
 YTA10 701 TKNLDDKVDLVAKELLRKEAITREDMIRLLGPRPFKERNEAFEKYL---- 745  
 :...: |.: |...:..||.:. ||. |...: |.:...||  
 YTA12 755 KEKAEDVEKIAQVLLKKEVLTREDMIDLLGKRPFPERNDAFDKYLNDYET 804  
 YTA10 746 -----DPKSNTPEPEAPATN\* 762  
 :.. |.: |...:..||  
 YTA12 805 EKIRKEEEKNEKRNEPKPSTN\* 826

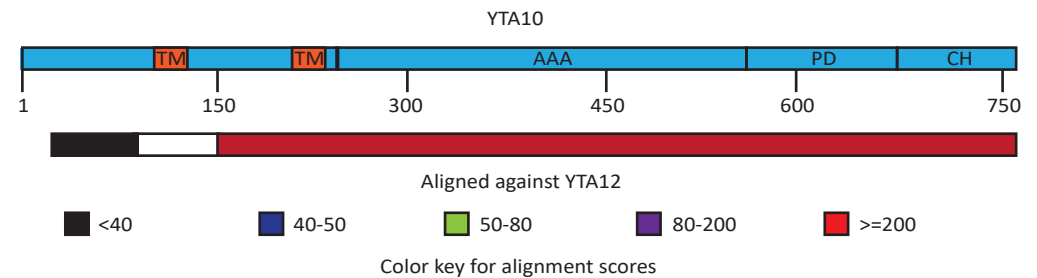

Supplement: 10.1074_M117.796763_jbc.M117.796763-1.pdf [file 10.1074_M117.796763_jbc.M117.796763-1.pdf]
